# Supplementary material
Source: Springer Nature journal article supplement (https://www.springermedizin.de/resource/supplementary/12936_2013_2685_MOESM2_ESM.pdf/9545146)

Percent (%) emergence

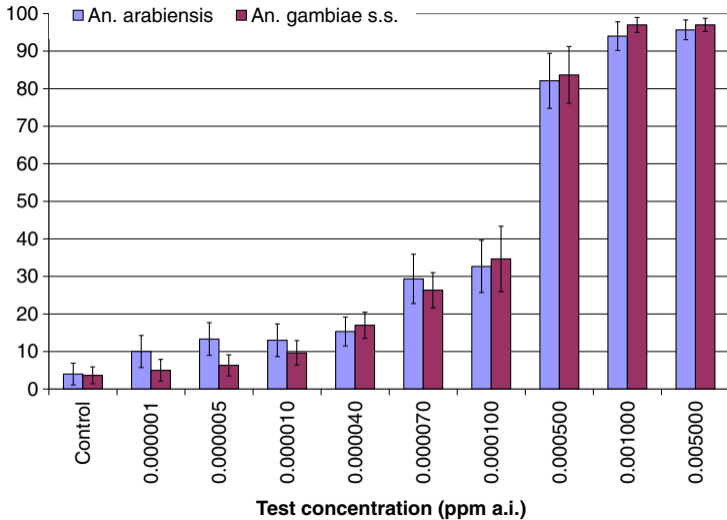

Supplement: MOESM2 [file 9545146]
